# Supplementary material for: Synthesis of graphene oxide-mediated high-porosity Ni/C aerogels through topological MOF deformation for enhanced electromagnetic absorption and thermal management
Source: Royal Society of Chemistry journal article supplement (doi:10.1039/d4ta00125g), 2024-01-01
Supplement: d4ta00125g1.pdf [file d4ta00125g1.pdf]

## **Supporting Information**

### **Graphene Oxide-Mediated High-Porosity Ni/C Aerogels through Topological MOFs Deformation for Enhanced Electromagnetic Absorption and Thermal Management**

Pan Wang, Dingge Fan, Lixue Gai, Bo Hu, Ping Xu, Xijiang Han\* and Yunchen Du\*

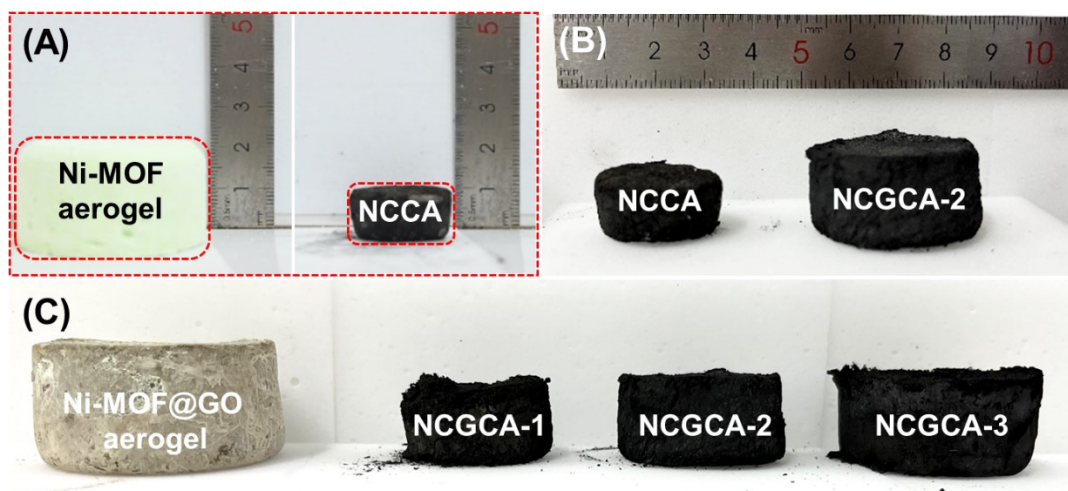

**Fig. S1†** Digital photos of Ni-MOF aerogel, NCCA, Ni-MOF@GO aerogel, and NCGCAs.

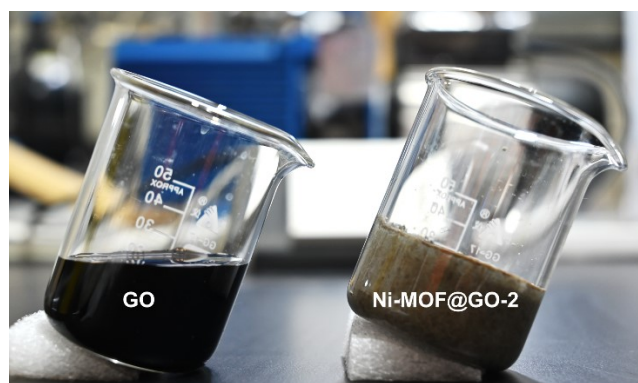

**Fig. S2†** Digital photos of GO and Ni-MOF@GO-2.

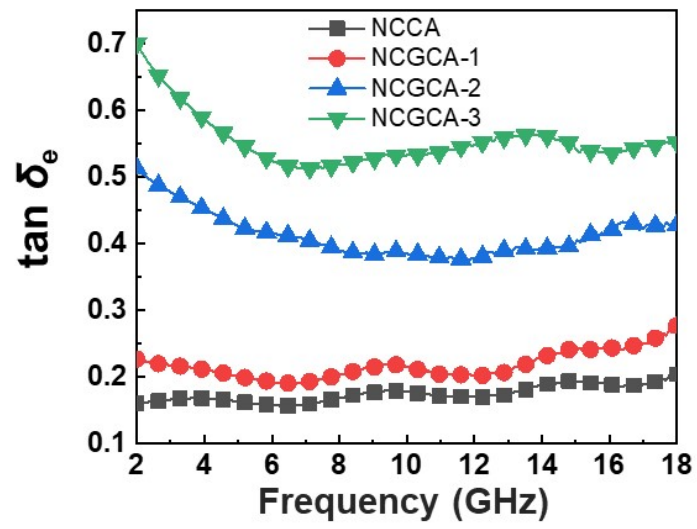

Fig. S3†  $\tan \delta_e$  values of NCCA and NCGCAs.

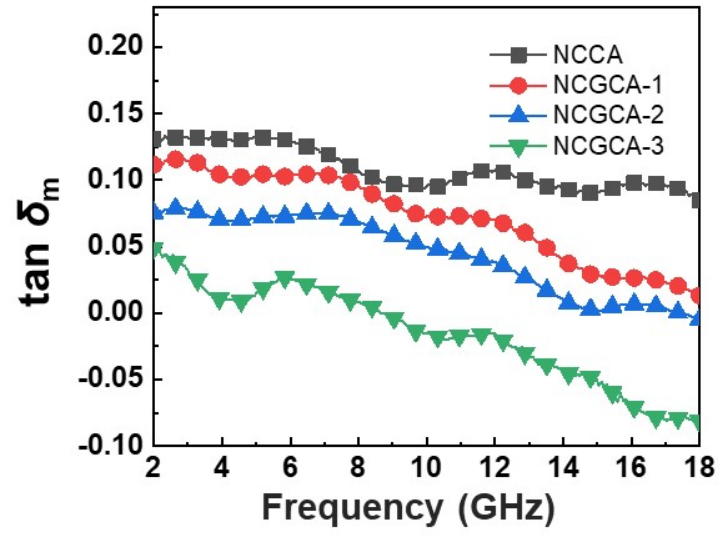

Fig. S4†  $\tan \delta_m$  values of NCCA and NCGCAs.

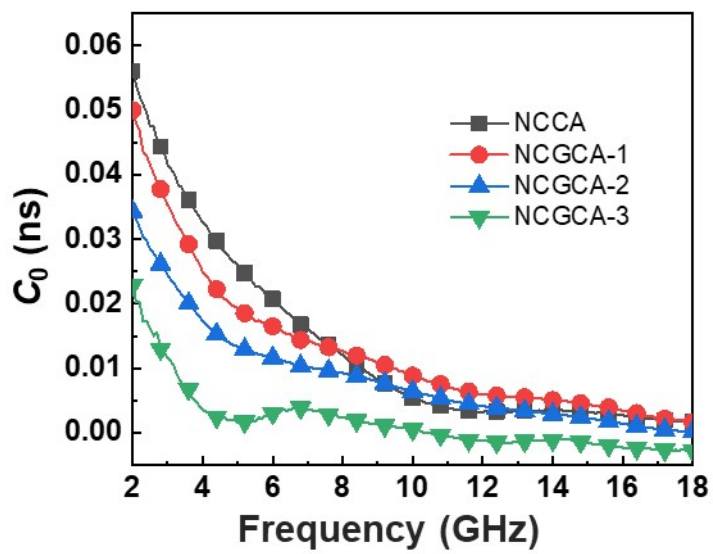

Fig. S5†  $C_0$  values of NCCA and NCGCAs.

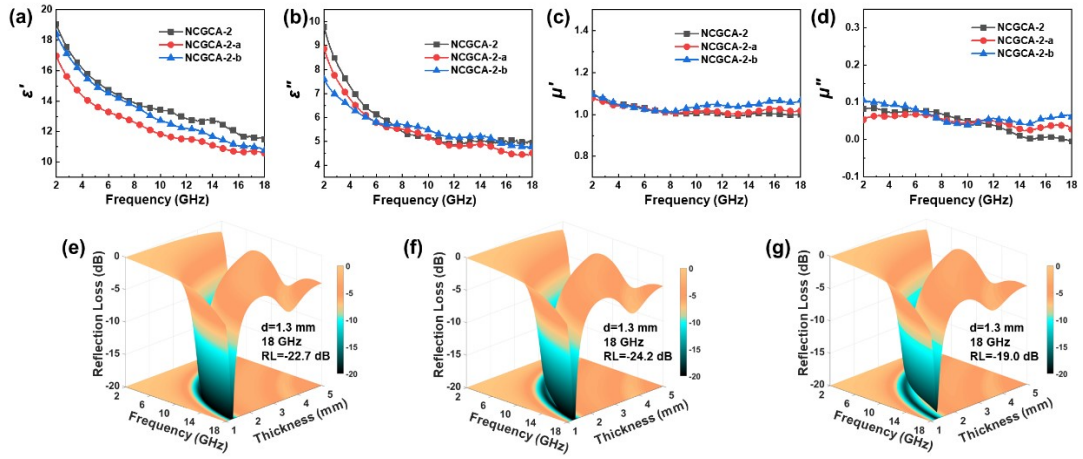

Fig. S6†  $\epsilon_r'$  (a),  $\epsilon_r''$  (b),  $\mu_r'$  (c),  $\mu_r''$  (d) of NCGCA-2, NCGCA-2-a and NCGCA-2-b; 3D RL maps of NCGCA-2 (e), NCGCA-2-a (f) and NCGCA-2-b (g).

**Table S1†** EAB and RL properties of some composites aerogels in previous references that possess similar chemical composition with NCGCA-2.

| Sample             | EAB<br>(GHz) | Minimum RL<br>(dB) | Thickness<br>(mm) | References       |
|--------------------|--------------|--------------------|-------------------|------------------|
| Ni/C aerogel       | 2.4          | -41.6              | 3.5               | 50               |
| Ni/C aerogel       | 3.6          | -23.0              | 2.0               | 51               |
| PPy/Ni/rGO aerogel | 4.3          | -18.2              | 1.5               | 52               |
| Ni/C aerogel       | 4.5          | -45.0              | 2.0               | 53               |
| Ni/rGO aerogel     | 4.6          | -20.2              | 3.0               | 54               |
| C/Ni/rGO aerogel   | 4.8          | -16.5              | 1.8               | 55               |
| C/Ni/PPy aerogel   | 4.8          | -21.6              | 2.0               | 56               |
| <b>NCCA</b>        | <b>2.2</b>   | <b>-19.2</b>       | <b>5.0</b>        | <b>This work</b> |
| <b>NCGCA-2</b>     | <b>5.2</b>   | <b>-22.7</b>       | <b>1.5</b>        | <b>This work</b> |
